# Supplementary material
Source: PubMed Central journal article supplement (PMC4059518)
Supplement: NIHMS449493-supplement-1_si_001.pdf [file NIHMS449493-supplement-1_si_001.pdf]

Supplemental Material for

# Inverse solvent isotope effects arising from substrate triggering in the factor inhibiting HIF (FIH-1)

John Hangasky,<sup>1</sup> Evren Saban,<sup>1</sup> Michael J. Knapp<sup>1\*</sup>

<sup>1</sup>Department of Chemistry

University of Massachusetts, Amherst, MA, 01003

Voice 413-545-4001, FAX 413-545-4490

[mknapp@chem.umass.edu](mailto:mknapp@chem.umass.edu)

1. Ionic Strength Effect on FIH
2. Solvent Viscosity Effect

## 1. Ionic Strength Effect on FIH

Steady-state assays varying CTAD were performed in 50 mM HEPES pH 7.00. Initial rates were measured as described in the text, using buffers with ionic strengths ranging from 25 mM to 150 mM.

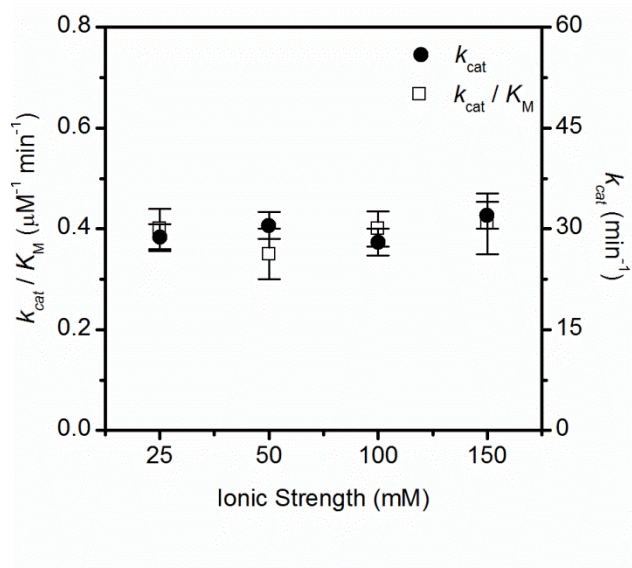

**Figure S1.** Effect of ionic strength on the kinetic parameters,  $k_{\text{cat}}$  (●),  $k_{\text{cat}}/K_{\text{M(CTAD)}}$ (□) of FIH. FIH (0.5  $\mu\text{M}$ ), ascorbate (2 mM),  $\alpha\text{KG}$  (500  $\mu\text{M}$ ),  $\text{FeSO}_4$  (50  $\mu\text{M}$ ) and CTAD (0-250  $\mu\text{M}$ ) were in 50mM HEPES pH 7.00. Ionic strength was adjusted using NaCl.

## 2. Solvent Viscosity Effect

The solvent viscosity effect was measured on  $k_{cat}$ ,  $k_{cat}/K_M(\text{CTAD})$  and  $k_{cat}/K_M(\alpha\text{KG})$ , as described in the text.

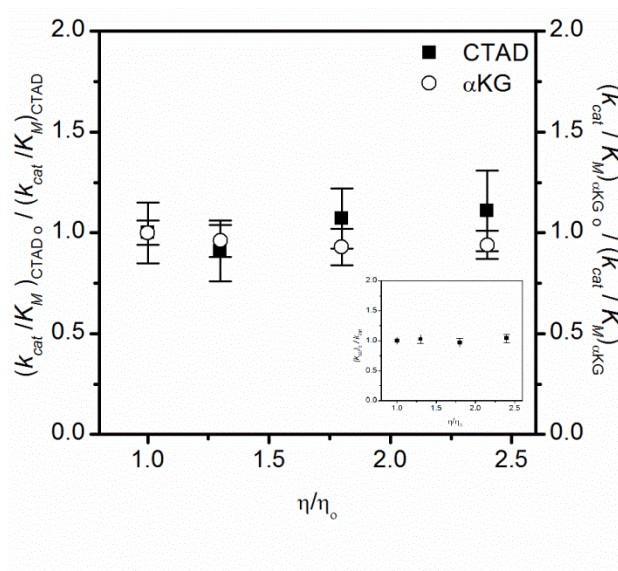

**Figure S2.** Microviscosity (sucrose) activity profile of FIH. CTAD was the varied substrate,  $k_{cat}/K_M(\text{CTAD})$  (■) and  $\alpha\text{KG}$  as the varied substrate,  $k_{cat}/K_M(\alpha\text{KG})$  (○). FIH (0.5  $\mu\text{M}$ ), ascorbate (2 mM),  $\alpha\text{KG}$  (500  $\mu\text{M}$  or 5-200  $\mu\text{M}$ ),  $\text{FeSO}_4$  (50  $\mu\text{M}$ ) and CTAD (90  $\mu\text{M}$  or 0-250  $\mu\text{M}$ ) were in 50mM HEPES pH 7.00. Inset: Effect of microviscosity on  $k_{cat}$ . FIH (0.5  $\mu\text{M}$ ), ascorbate (2 mM),  $\alpha\text{KG}$  (500  $\mu\text{M}$ ),  $\text{FeSO}_4$  (50  $\mu\text{M}$ ) and CTAD (0-250  $\mu\text{M}$ ) were in 50mM HEPES pH 7.00
